# Supplementary material
Source: publisher figshare collection journal article supplement (https://asha.figshare.com/ndownloader/files/26613026)
Supplement: Supplementary file 1 [file 26613026]

**Supplemental Material S1.** Participant average CNV waveforms for Go and NoGo trials for individual participants and each protocol by laterality. The waveforms are aligned to S2 onset (0 seconds on x-axis).

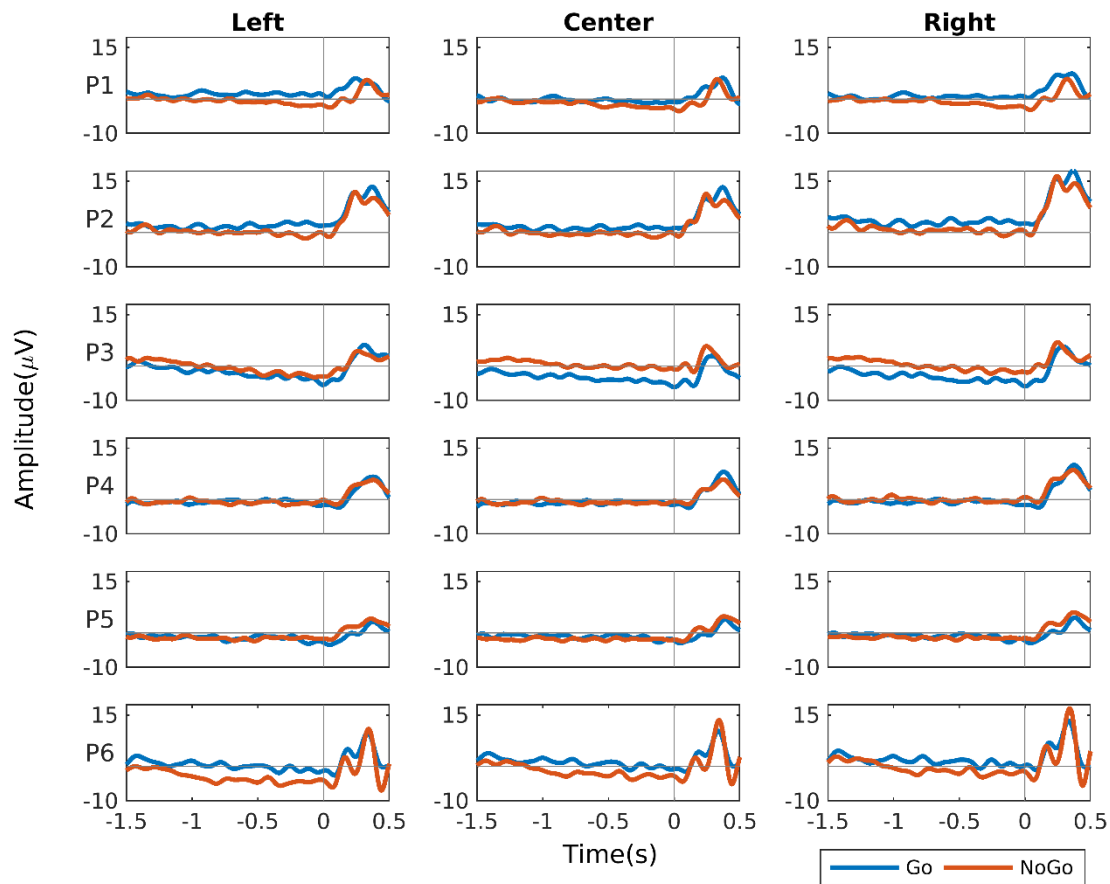

**Supplemental Figure 1a.** Participants from Protocol 1.

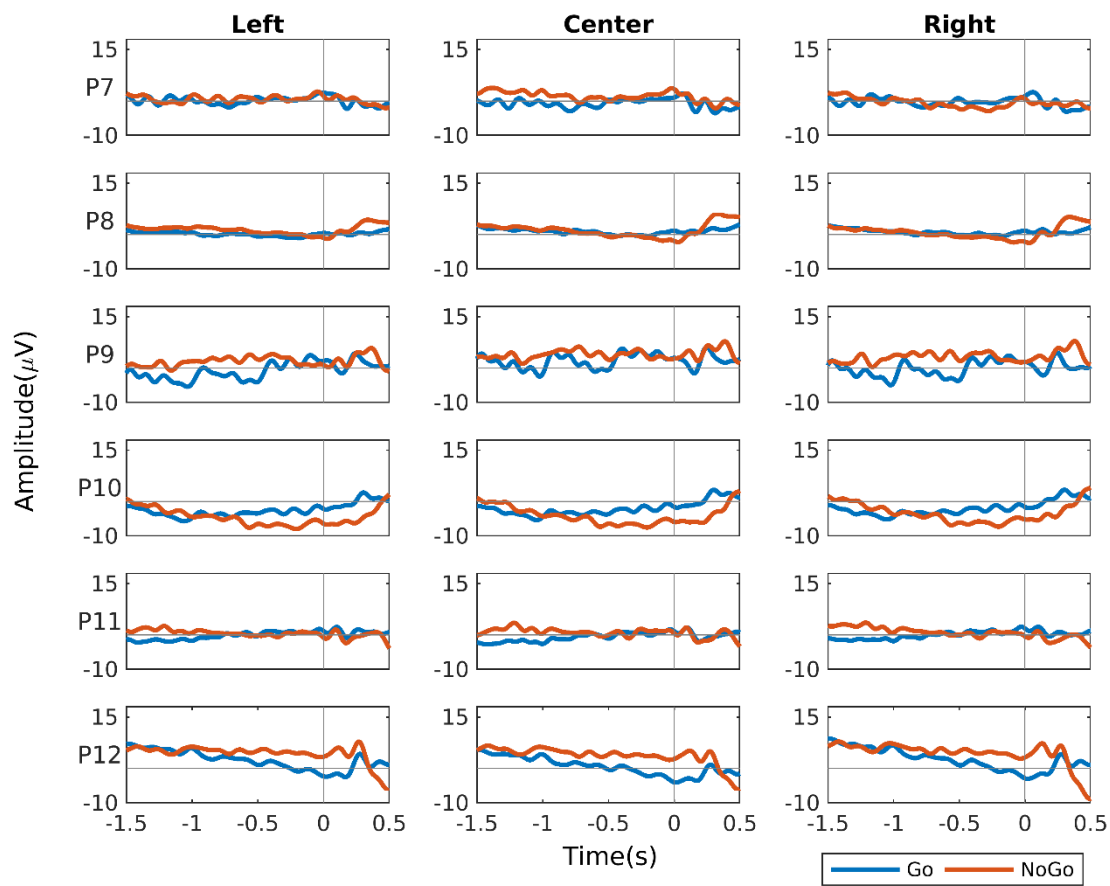

**Supplemental Figure 1b.** Participants from Protocol 2.

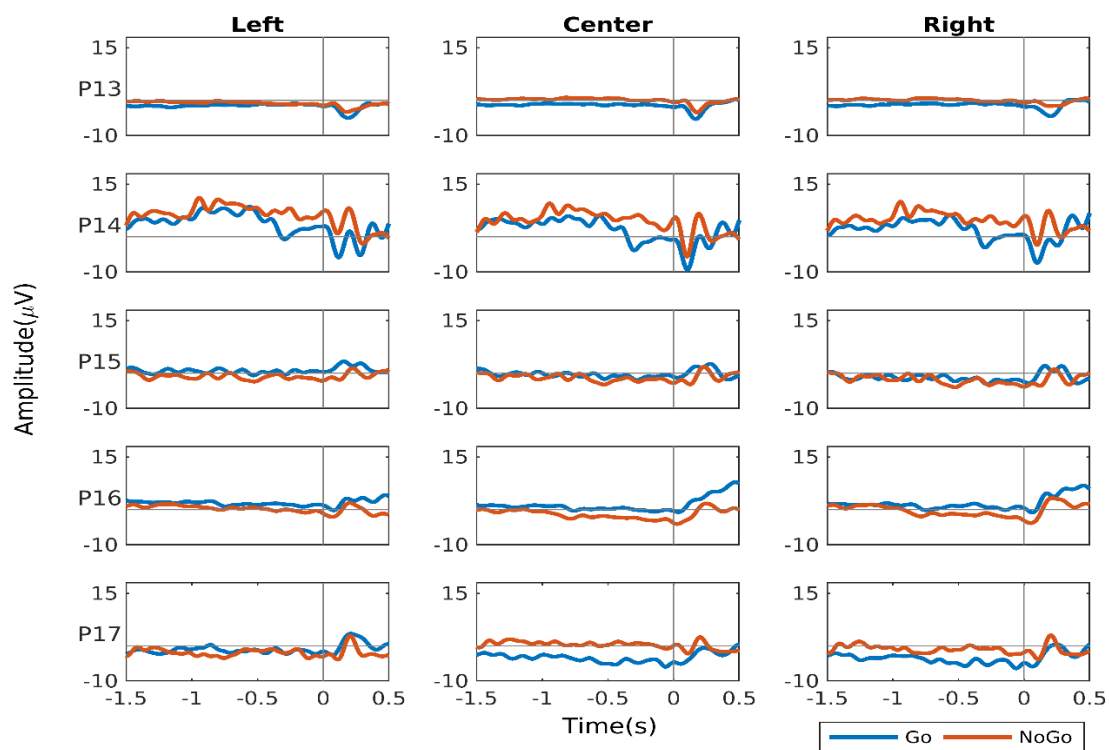

**Supplemental Figure 1c.** Participants from Protocol 3.

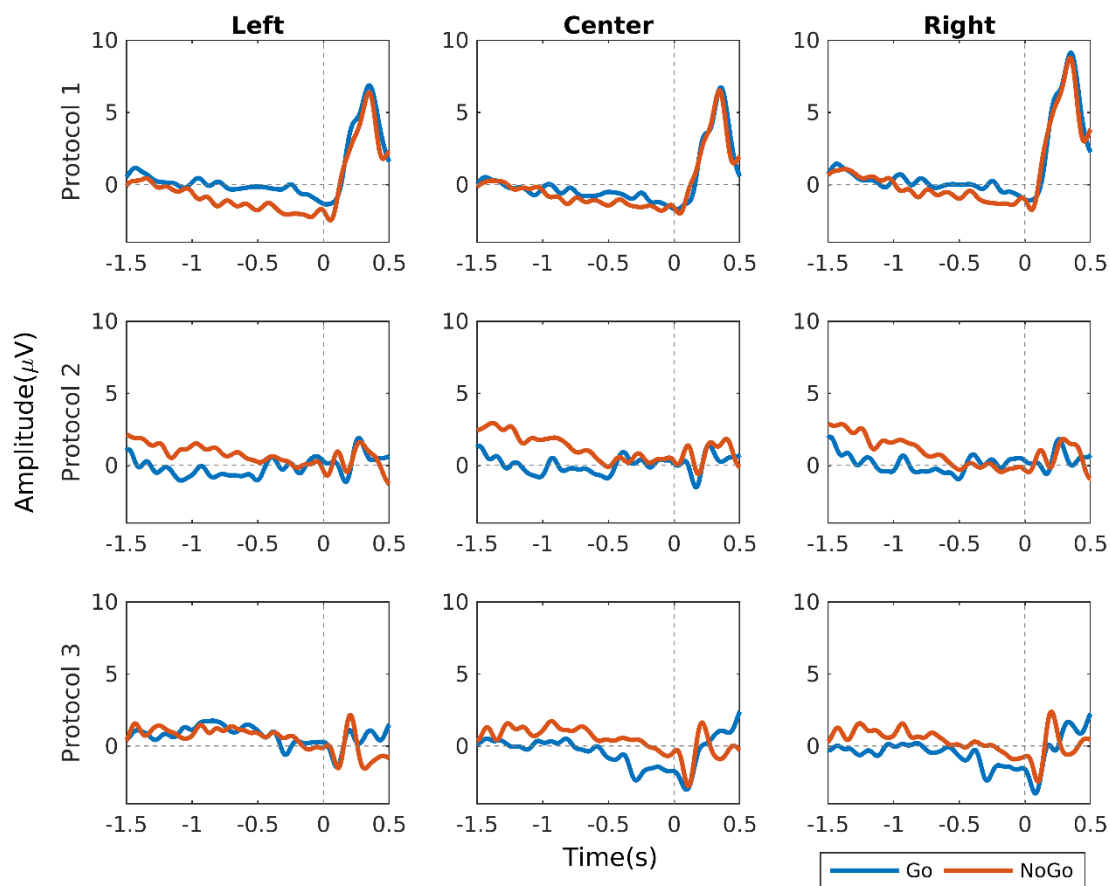

**Supplemental Figure 1d.** Grand average CNV for Go and NoGo trials each protocol by hemisphere laterality.
